# Supplementary material
Source: publisher site journal article supplement (https://www.dovepress.com/article/239752)

**Supplemental Table 1** Clinicopathologic characteristics of the 20 tissue samples in Gastric Cancer patients

| Category | n |
| --- | --- |
|
|  | 20 |
| Gender |  |
| Male | 12 |
| Female | 8 |
| Age |  |
| <60 | 9 |
| ≥60 | 11 |
| Tumor size, cm |  |
| <5 | 13 |
| ≥5 | 7 |
| Depth of invasion |  |
| T1-T2 | 6 |
| T3-T4 | 14 |
| Stages |  |
| I-II | 7 |
| III-IV | 13 |
| Differentiation |  |
| Well and moderate | 11 |
| Poorly and not | 9 |
| Lymph node metastases |  |
| 0 | 8 |
| ≥1 | 12 |
| Metastases to other organs |  |
| Present | 1 |
| Absent | 19 |

**Supplemental Table 2** Primers for RT-PCR

| Gene | Sequences |
| --- | --- |
| E2F3 | F: 5’- AACAACCAAGACCACAATG -3’ |
| R: 5’- AATCGCTATGTCCTGAGTT-3’ |
| PLK1 | F: 5’- GGCAACCTTTTCCTGAATGA-3’ |
| R: 5’- AATGGACCACACATCCACCT-3’ |
| GAPDH | F: 5’-GGTGAAGGTCGGA-GTCAAC-3’ |
| R: 5’-AGAGTTAAAAGC-AGCCCTGGTG-3’ |


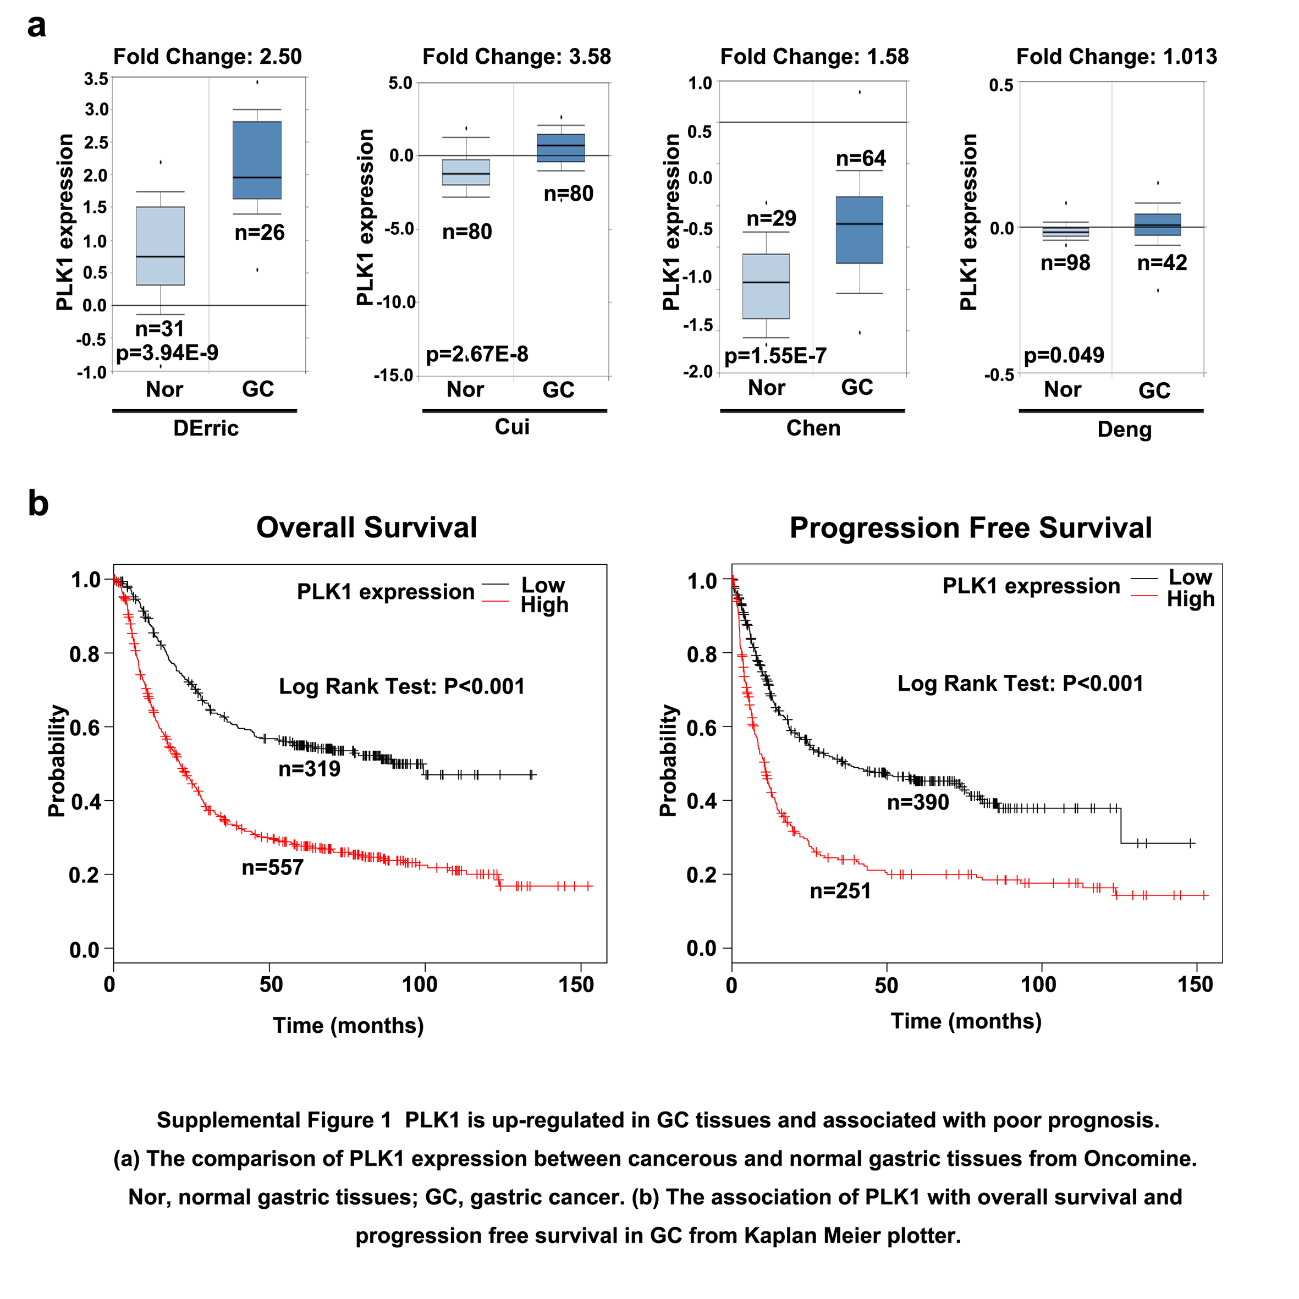

Supplement: Supplementary file 1 [file get_supplementary_file.php]
